# Supplementary material
Source: publisher figshare collection journal article supplement (https://acs.figshare.com/ndownloader/files/4372534)
Supplement: Supplementary file 1 [file 4372534]

## Supporting Information

### A One-Pot Synthesis of Pt Nanocubes and Nanopods via Burst Nucleation and Controlled Secondary Growth

Max N. Mankin, Vismadeb Mazumder, and Shouheng Sun\*

*Department of Chemistry, Brown University, Providence, Rhode Island 02912*

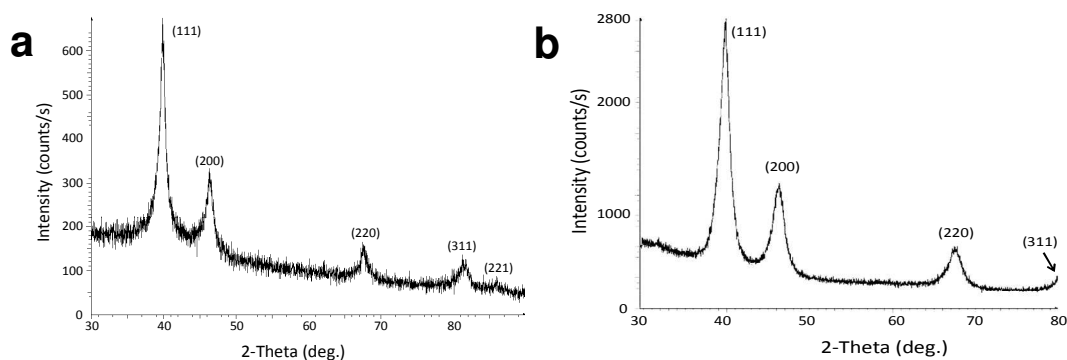

**Figure S1.** XRD patterns of (a) the Pt nanocube assembly and (b) the Pt nanopod assembly.

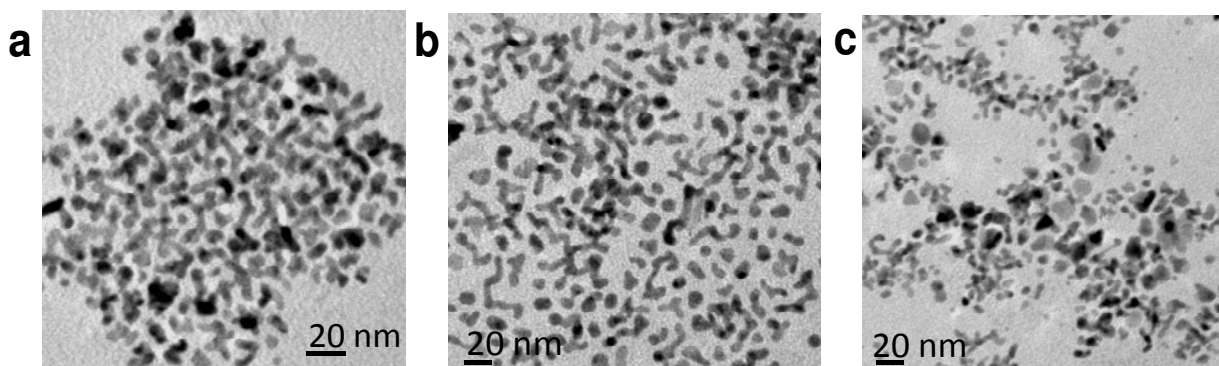

**Figure S2.** TEM images of Pd nanoparticles resulting from the substitution of N-methyl-2-pyrrolidone with (a) 2-pyrrolidone, (b) cyclopentanone, (c) tetrahydrofuran.
